# Supplementary material for: Enlightening the taxonomy darkness of human gut microbiomes with a cultured biobank
Source: PubMed Central journal article supplement (PMC8140505; doi:10.1186/s40168-021-01064-3), 2021-05-21
Supplement: 40168_2021_1064_MOESM2_ESM.pdf [file 40168_2021_1064_MOESM2_ESM.pdf]

ANI between adjacent taxa

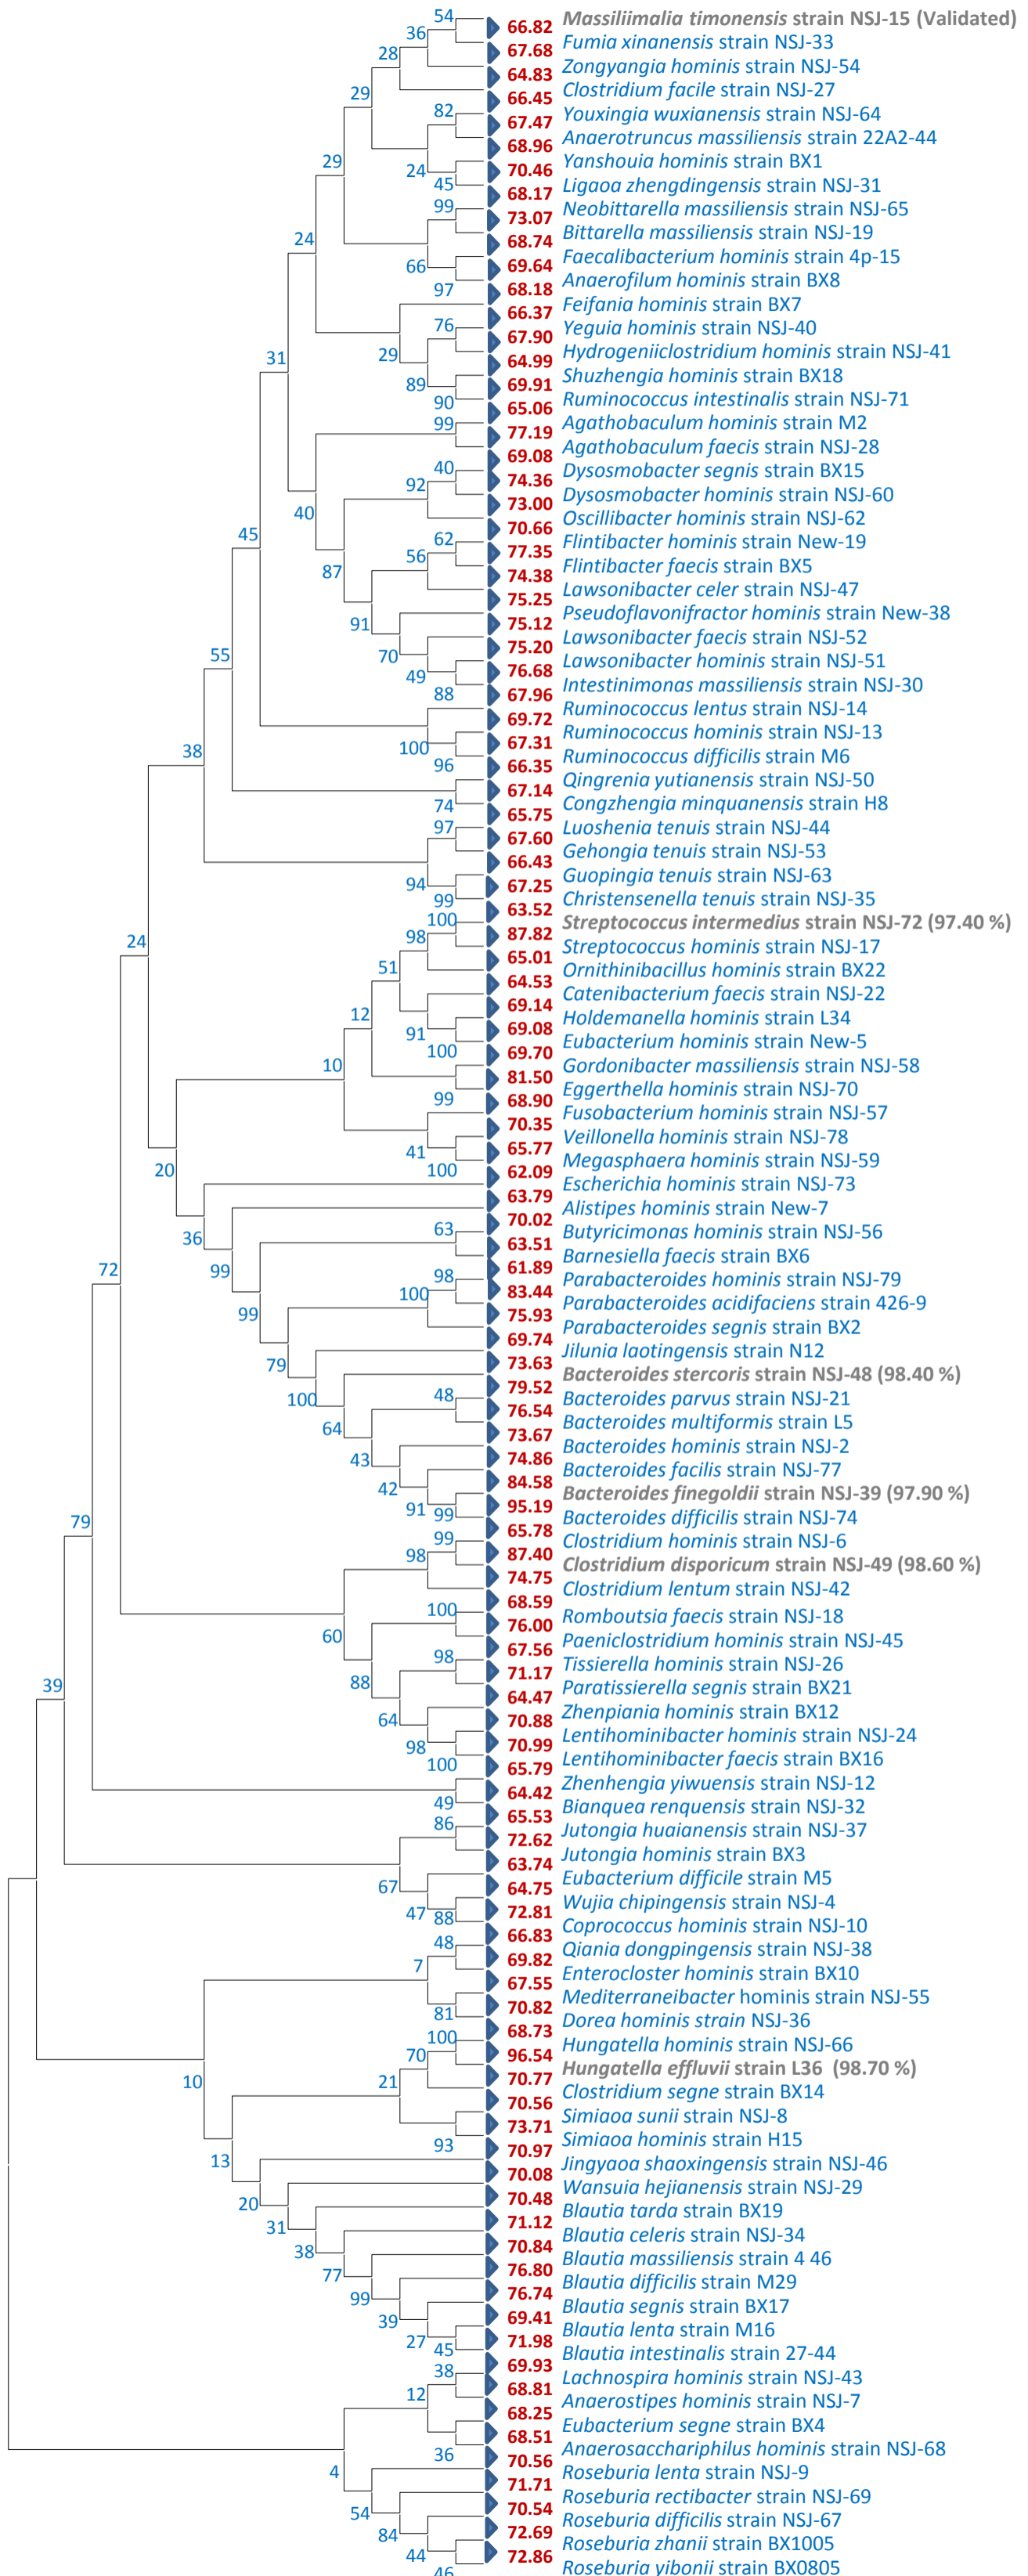

0.20
